# Supplementary material
Source: Springer Nature journal article supplement (https://www.springermedizin.de/resource/supplementary/12913_2013_3389_MOESM1_ESM.pdf/9532612)

Start of mCRPC

End-of-life

2<sup>nd</sup> HT

2<sup>nd</sup> HT wd

1<sup>st</sup> chemo/3<sup>rd</sup> HT

3<sup>rd</sup> HT/1<sup>st</sup> chemo

2<sup>nd</sup> chemo/OtherTx

OtherTx

**A) Current model**

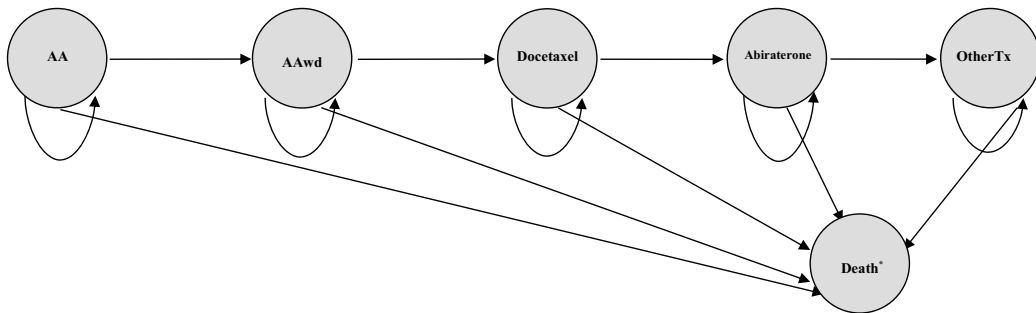

**B) Alternate model**

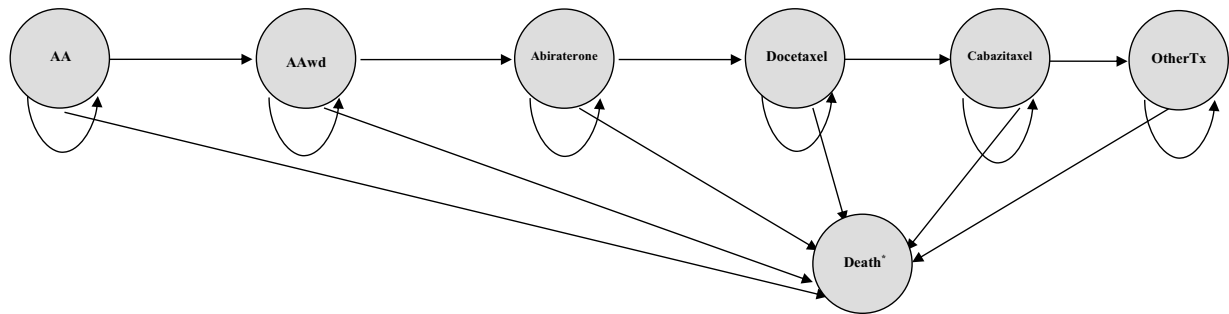

Supplement: MOESM1 [file 9532612]
